# Supplementary material for: A green protocol for the synthesis of conformationally rigid sulfur linked bisquinolines by double Friedlander reaction in water
Source: Royal Society of Chemistry journal article supplement (doi:10.1039/c1nj20539k), 2011-01-01
Supplement: c1nj20539k.pdf [file c1nj20539k.pdf]

## Supporting Information

### A green protocol for the synthesis of conformationally rigid sulfur linked bisquinolines by double Friedlander reaction in water

Nidhin Paul<sup>a</sup>, Shanmugam Muthusubramanian<sup>a\*</sup> and Nattamai Bhuvanesh<sup>b</sup>

<sup>a</sup>*Department of Organic Chemistry, School of Chemistry, Madurai Kamaraj University,*

*Madurai – 625 021, Tamil Nadu, India*

<sup>b</sup>*Department of Organic Chemistry, Texas A & M University, College Station, TX, 77843, U.S.A*

E-mail: [muthumanian2001@yahoo.com](mailto:muthumanian2001@yahoo.com)

### Experimental

#### General

All melting points reported in this work were measured in open capillaries. The <sup>1</sup>H, <sup>13</sup>C NMR and 2D NMR spectra have been measured at 300 and 75 MHz respectively using Bruker 300 MHz (Avance) instrument in CDCl<sub>3</sub> using tetramethylsilane (TMS) as internal standard. Chemical shifts are reported as δ values (ppm). For compounds **5a-e**, all the carbon signals are not picked up. All one- and two-dimensional NMR spectra were obtained using standard Bruker software throughout. Silica gel-G plates (Merck) were used for TLC analysis with a mixture of petroleum ether (60–80 °C) and ethyl acetate as eluent. Elemental analyses were performed on a Perkin Elmer 2400 Series II Elemental CHNS analyzer. IR spectra were recorded on a JASCO FT IR instrument (KBr pellet method).

#### Crystallographic Investigations

Crystals suitable for X-ray crystallographic studies were obtained by crystallization from 1:1 mixture of dichloromethane and DMF. Crystallographic data for compounds **3h**, **3c** and **5e** are given in table below.

| Compound                          | 3h                                                                                     | 3c                                                                                                 | 5e                                                                                                 |
|-----------------------------------|----------------------------------------------------------------------------------------|----------------------------------------------------------------------------------------------------|----------------------------------------------------------------------------------------------------|
| Empirical formula                 | C <sub>42</sub> H <sub>26</sub> Cl <sub>2</sub> N <sub>2</sub> S                       | C <sub>42</sub> H <sub>26</sub> Cl <sub>2</sub> N <sub>2</sub> S                                   | C <sub>42</sub> H <sub>24</sub> Cl <sub>4</sub> N <sub>2</sub> S <sub>2</sub>                      |
| Formula weight                    | 661.62                                                                                 | 661.62                                                                                             | 762.55                                                                                             |
| Temperature                       | 110(2) K                                                                               | 100(2) K                                                                                           | 110(2) K                                                                                           |
| Wavelength                        | 1.54178 Å                                                                              | 0.71073 Å                                                                                          | 0.71073 Å                                                                                          |
| Crystal system                    | Monoclinic                                                                             | Triclinic                                                                                          | Triclinic                                                                                          |
| Space group                       | P2(1)/n                                                                                | P-1                                                                                                | P-1                                                                                                |
| Unit cell dimensions              | a = 20.036(3) Å; α = 90°; b = 8.2313(13) Å; β = 115.113(8)°; c = 21.197(5) Å; γ = 90°. | a = 11.115(5) Å; α = 67.905(5)°; b = 12.085(5) Å; β = 86.187(5)°; c = 13.476(5) Å; γ = 73.358(4)°. | a = 10.422(5) Å; α = 76.543(5)°; b = 13.304(6) Å; β = 83.590(5)°; c = 13.766(6) Å; γ = 70.965(4)°. |
| Volume                            | 3165.4(10) Å <sup>3</sup>                                                              | 1605.2(12) Å <sup>3</sup>                                                                          | 1753.5(13) Å <sup>3</sup>                                                                          |
| Z                                 | 4                                                                                      | 2                                                                                                  | 2                                                                                                  |
| Density (calculated)              | 1.388 Mg/m <sup>3</sup>                                                                | 1.369 Mg/m <sup>3</sup>                                                                            | 1.444 Mg/m <sup>3</sup>                                                                            |
| Absorption coefficient            | 2.728 mm <sup>-1</sup>                                                                 | 0.302 mm <sup>-1</sup>                                                                             | 0.492 mm <sup>-1</sup>                                                                             |
| F(000)                            | 1368                                                                                   | 684                                                                                                | 780                                                                                                |
| Crystal size                      | 0.13 x 0.06 x 0.03 mm <sup>3</sup>                                                     | 0.20 x 0.16 x 0.14 mm <sup>3</sup>                                                                 | 0.50 x 0.20 x 0.20 mm <sup>3</sup>                                                                 |
| Theta range for data collection   | 2.54 to 60.00°.                                                                        | 2.28 to 27.90°.                                                                                    | 1.52 to 27.43°.                                                                                    |
| Index ranges                      | -22 ≤ h ≤ 22, -9 ≤ k ≤ 9, -23 ≤ l ≤ 23                                                 | -14 ≤ h ≤ 14, -12 ≤ k ≤ 16, -13 ≤ l ≤ 17                                                           | -13 ≤ h ≤ 13, -17 ≤ k ≤ 17, -17 ≤ l ≤ 17                                                           |
| Reflections collected             | 17717                                                                                  | 10483                                                                                              | 19832                                                                                              |
| Independent reflections           | 4584 [R(int) = 0.0984]                                                                 | 7581 [R(int) = 0.0246]                                                                             | 7807 [R(int) = 0.0228]                                                                             |
| Completeness to theta = 60.00°    | 97.5 %                                                                                 | 98.9 %                                                                                             | 97.6 %                                                                                             |
| Max. and min. transmission        | 0.9226 and 0.7181                                                                      | 0.9590 and 0.9440                                                                                  | 0.9080 and 0.7910                                                                                  |
| Data / restraints / parameters    | 4584 / 0 / 424                                                                         | 7581 / 0 / 424                                                                                     | 7807 / 0 / 451                                                                                     |
| Goodness-of-fit on F <sup>2</sup> | 1.041                                                                                  | 1.173                                                                                              | 1.028                                                                                              |
| Final R indices [I > 2σ(I)]       | R1 = 0.0496, wR2 = 0.1179                                                              | R1 = 0.0657, wR2 = 0.1754                                                                          | R1 = 0.0401, wR2 = 0.0951                                                                          |
| R indices (all data)              | R1 = 0.0783, wR2 = 0.1304                                                              | R1 = 0.0913, wR2 = 0.2521                                                                          | R1 = 0.0463, wR2 = 0.0986                                                                          |
| Largest diff. peak and hole       | 0.289 and -0.303 e.Å <sup>-3</sup>                                                     | 0.684 and -0.749 e.Å <sup>-3</sup>                                                                 | 0.352 and -0.369 e.Å <sup>-3</sup>                                                                 |

### General procedure for synthesis of quinoline derivatives (3/5)

2-[(2-Oxo-2-arylethyl)sulfanyl]-1-aryl-1-ethanone/ 2-[(2-oxo-2-phenylethyl)disulfanyl]-1-aryl-1-ethanone **2/4** (0.1 mole) and 2-amino benzophenone **1** (0.2 mole) were taken in 15 mL water followed by the addition of *p*-toluenesulphonic acid (10 mol%) and refluxed for 1-2 h. After the completion of the reaction (monitored by TLC), the mixture was cooled to room temperature and the solid was filtered out and recrystallised from dichloromethane-ethyl acetate (8:2) mixture to yield pure product.

| No. | List of Figures                                                            | Page |
|-----|----------------------------------------------------------------------------|------|
| 1   | <sup>1</sup> H NMR Spectrum of <b>3m</b> (recorded in CDCl <sub>3</sub> )  | 04   |
| 2   | <sup>13</sup> C NMR Spectrum of <b>3m</b> (recorded in CDCl <sub>3</sub> ) | 04   |
| 3   | <sup>13</sup> C NMR Spectrum of <b>3m</b> (expanded)                       | 05   |
| 4   | <sup>1</sup> H NMR Spectrum of <b>3i</b> (recorded in CDCl <sub>3</sub> )  | 05   |
| 5   | <sup>1</sup> H NMR Spectrum of <b>3i</b> (expanded)                        | 06   |
| 6   | <sup>13</sup> C NMR Spectrum of <b>3i</b> (recorded in CDCl <sub>3</sub> ) | 06   |
| 7   | <sup>13</sup> C NMR Spectrum of <b>3i</b> (expanded)                       | 07   |
| 8   | DEPT-135 Spectrum of <b>3i</b> (CDCl <sub>3</sub> )                        | 07   |
| 9   | H,H-COSY Spectrum of <b>3i</b> (recorded in CDCl <sub>3</sub> )            | 08   |
| 10  | H,H-COSY Spectrum of <b>3i</b> (expanded)                                  | 08   |
| 11  | HMBC Spectrum of <b>3i</b> (recorded in CDCl <sub>3</sub> )                | 09   |
| 12  | HMBC Spectrum of <b>3i</b> (expanded)                                      | 09   |
| 13  | C,H-COSY Spectrum of <b>3i</b> (recorded in CDCl <sub>3</sub> )            | 10   |
| 14  | C,H-COSY Spectrum of <b>3i</b> (expanded)                                  | 10   |
| 15  | <sup>1</sup> H NMR Spectrum of <b>5b</b> (recorded in CDCl <sub>3</sub> )  | 11   |
| 16  | <sup>1</sup> H NMR Spectrum of <b>5b</b> (expanded)                        | 11   |
| 17  | <sup>13</sup> C NMR Spectrum of <b>5b</b> (recorded in CDCl <sub>3</sub> ) | 12   |
| 18  | DEPT-135 Spectrum of <b>5b</b> (CDCl <sub>3</sub> )                        | 12   |
| 19  | H,H-COSY Spectrum of <b>5b</b> (recorded in CDCl <sub>3</sub> )            | 13   |
| 20  | H,H-COSY Spectrum of <b>5b</b> (expanded)                                  | 13   |
| 21  | HMBC Spectrum of <b>5b</b> (recorded in CDCl <sub>3</sub> )                | 14   |
| 22  | HMBC Spectrum of <b>5b</b> (expanded)                                      | 14   |
| 23  | C,H-COSY Spectrum of <b>5b</b> (recorded in CDCl <sub>3</sub> )            | 15   |
| 24  | C,H-COSY Spectrum of <b>5b</b> (expanded)                                  | 15   |
| 25  | Mass spectrum of <b>3b</b>                                                 | 16   |
| 26  | Mass spectrum of <b>3f</b>                                                 | 17   |
| 27  | Mass spectrum of <b>5a</b>                                                 | 18   |
| 28  | Mass spectrum of <b>5c</b>                                                 | 18   |

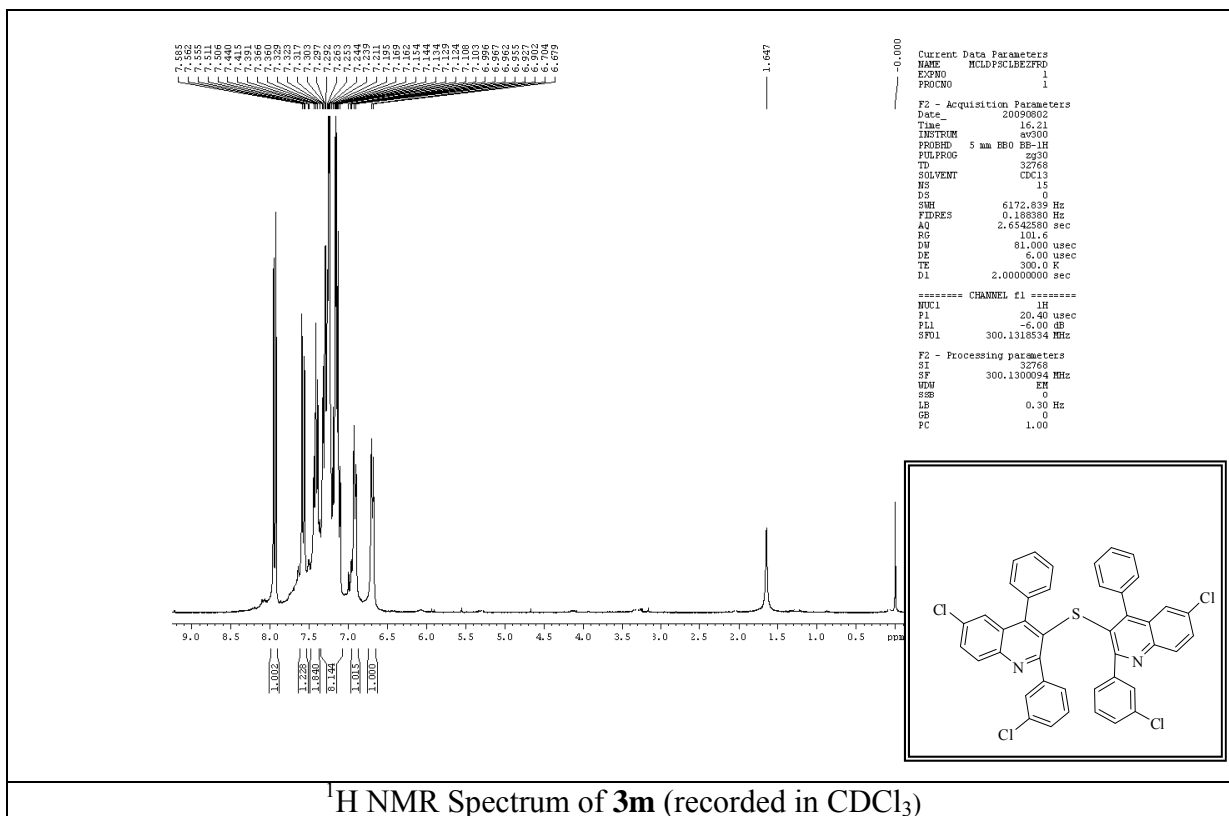

<sup>1</sup>H NMR Spectrum of **3m** (recorded in CDCl<sub>3</sub>)

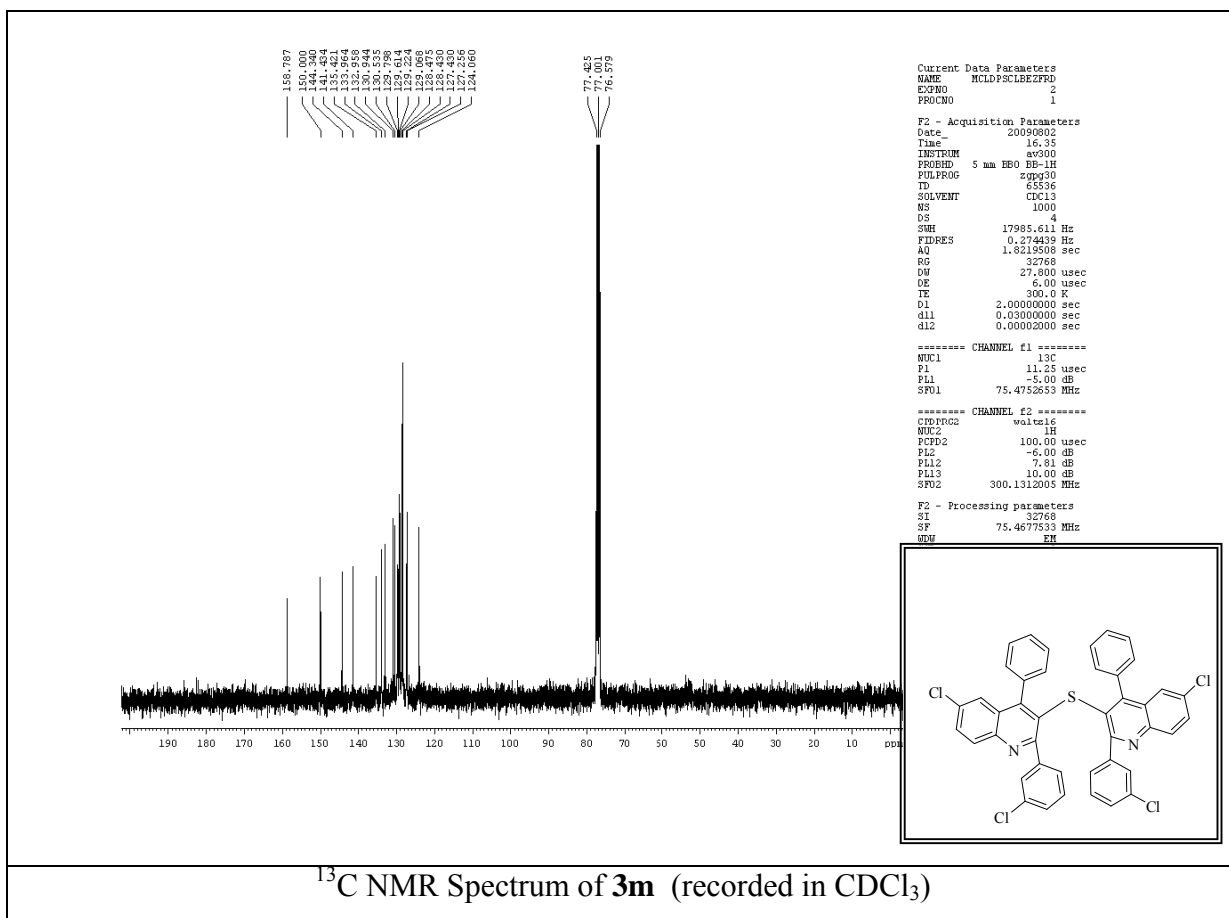

<sup>13</sup>C NMR Spectrum of **3m** (recorded in CDCl<sub>3</sub>)

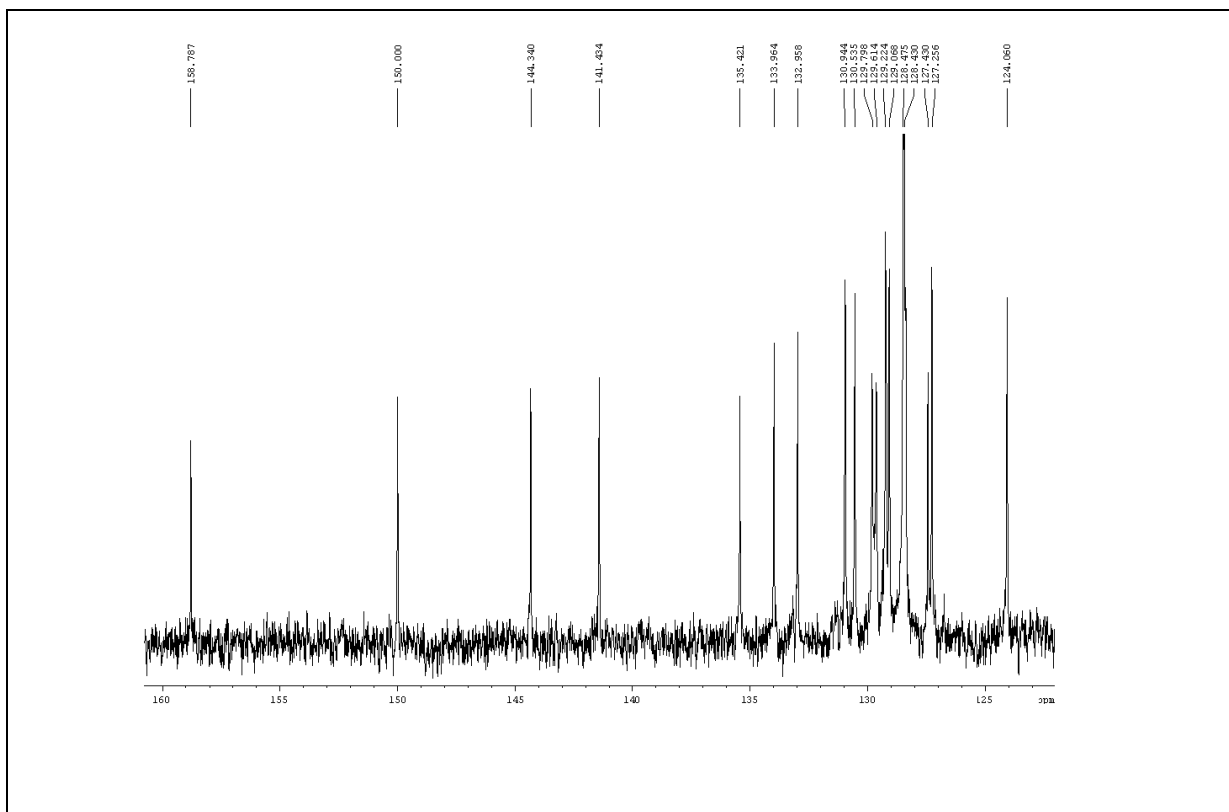

<sup>13</sup>C NMR Spectrum of **3m** (expanded)

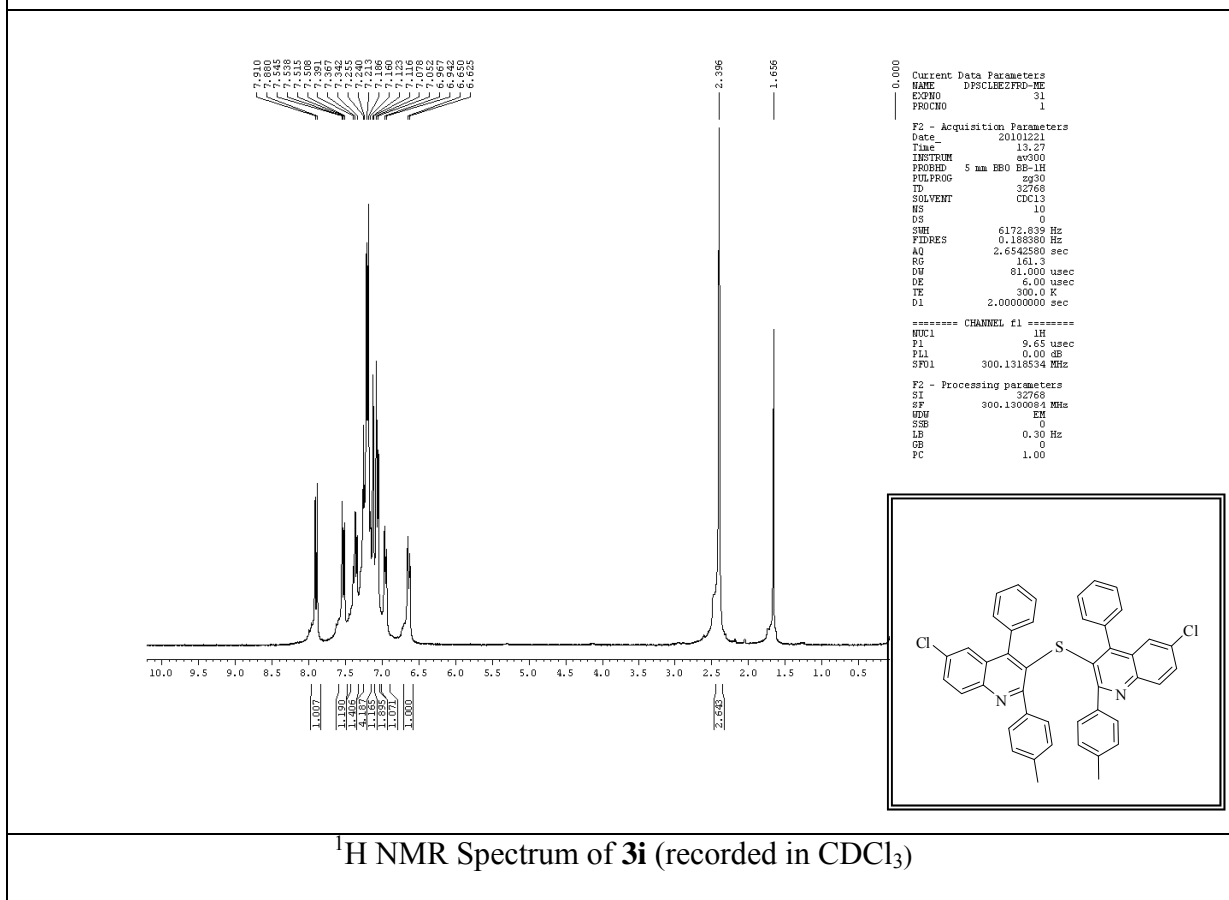

<sup>1</sup>H NMR Spectrum of **3i** (recorded in CDCl<sub>3</sub>)

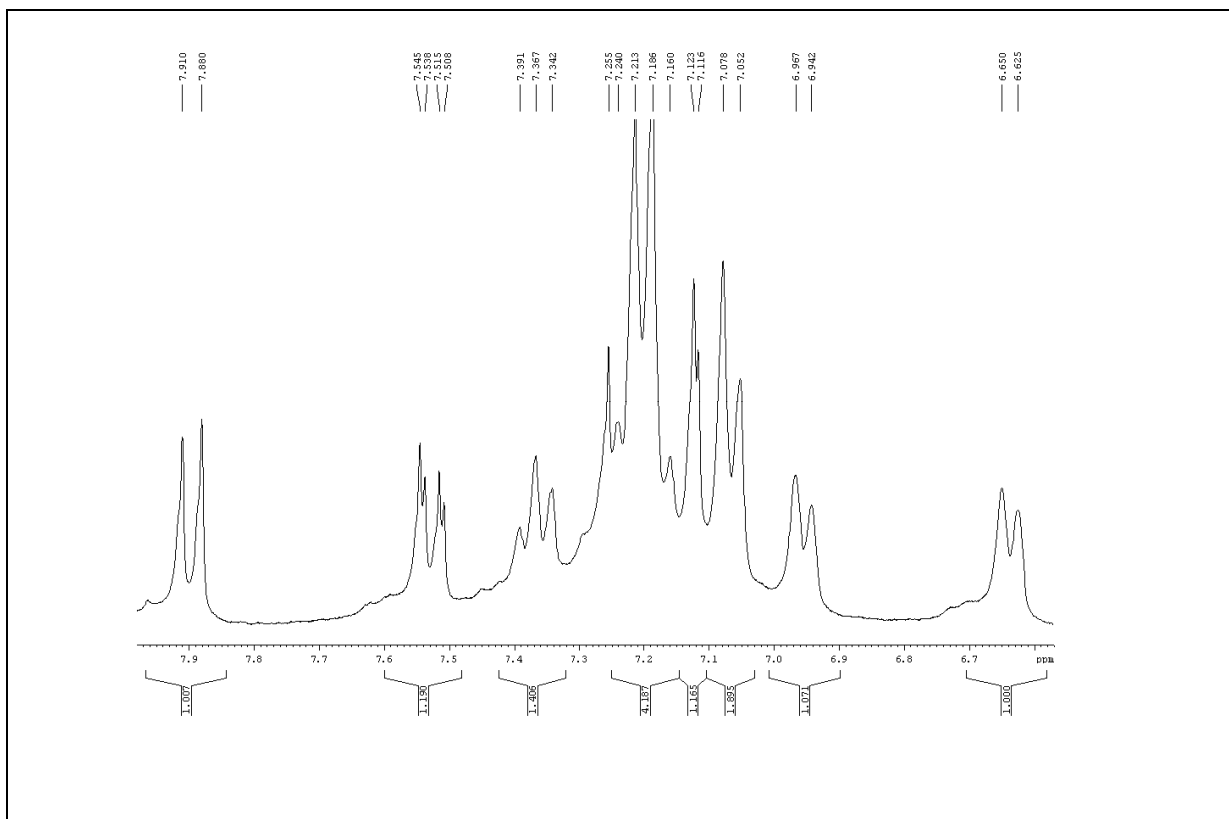

<sup>1</sup>H NMR Spectrum of **3i** (expanded)

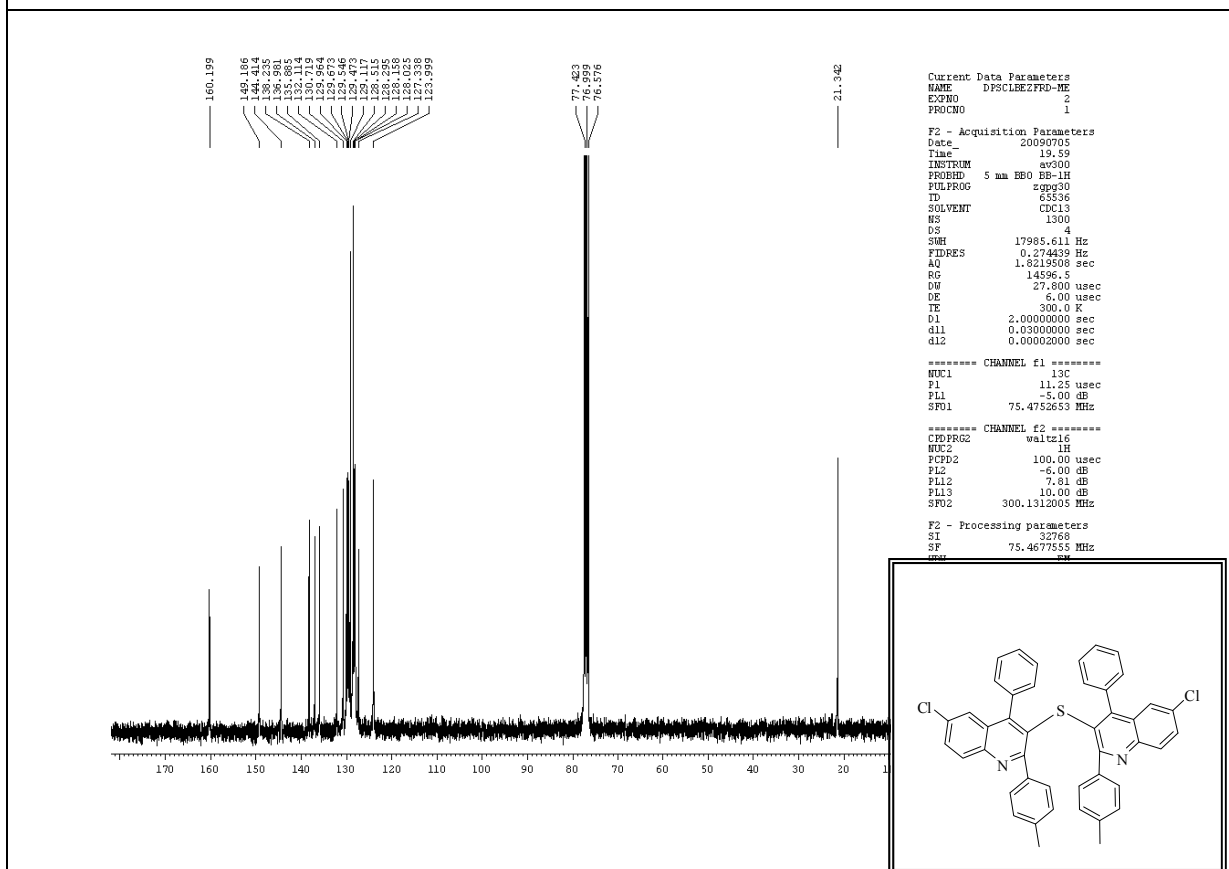

<sup>13</sup>C NMR Spectrum of **3i** (recorded in CDCl<sub>3</sub>)

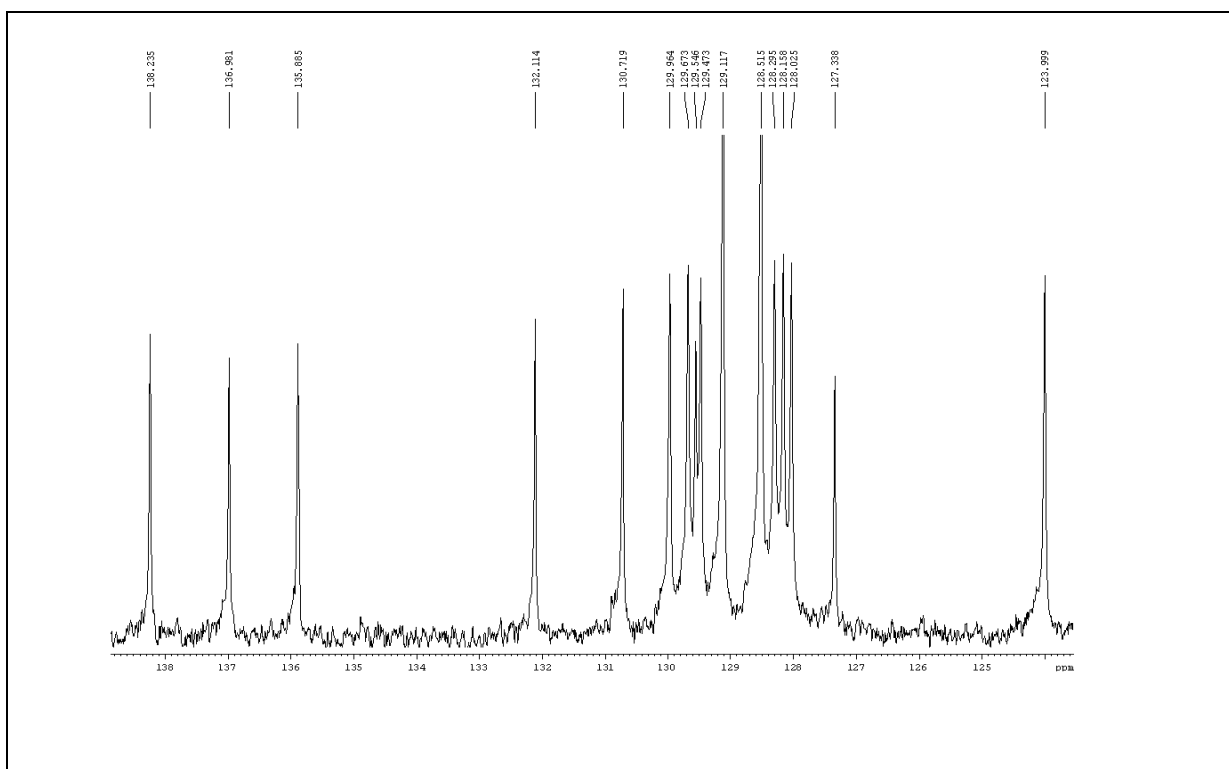

<sup>13</sup>C NMR Spectrum of **3i** (expanded)

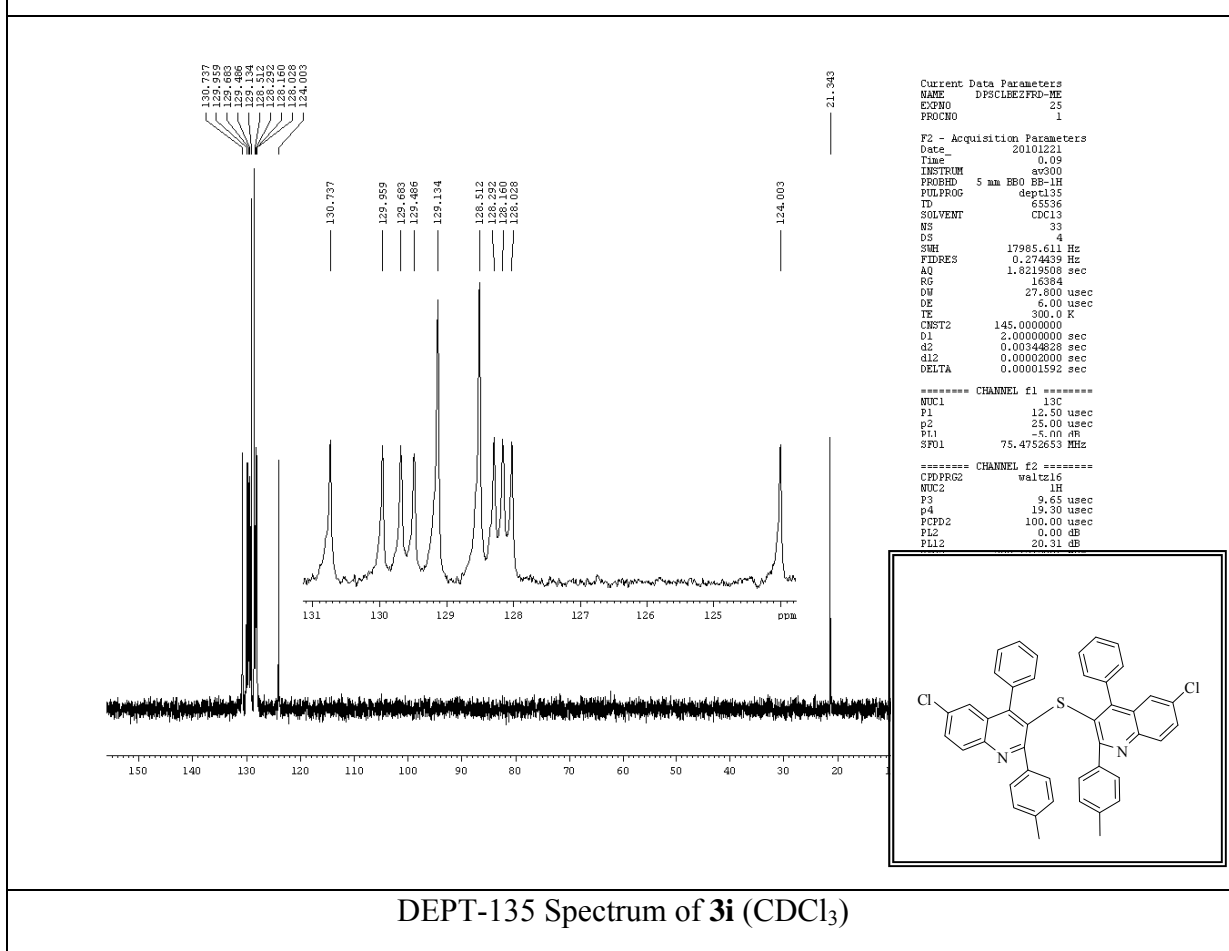

DEPT-135 Spectrum of **3i** (CDCl<sub>3</sub>)

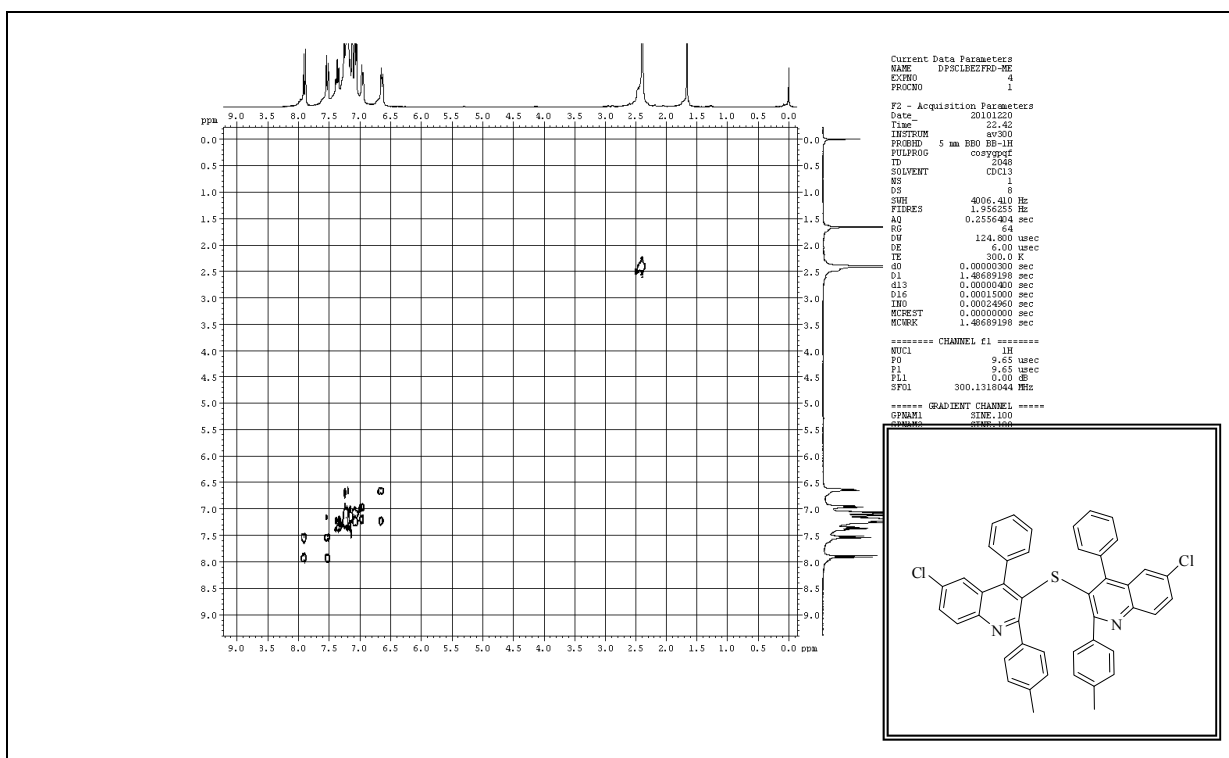

H,H-COSY Spectrum of **3i** (recorded in CDCl<sub>3</sub>)

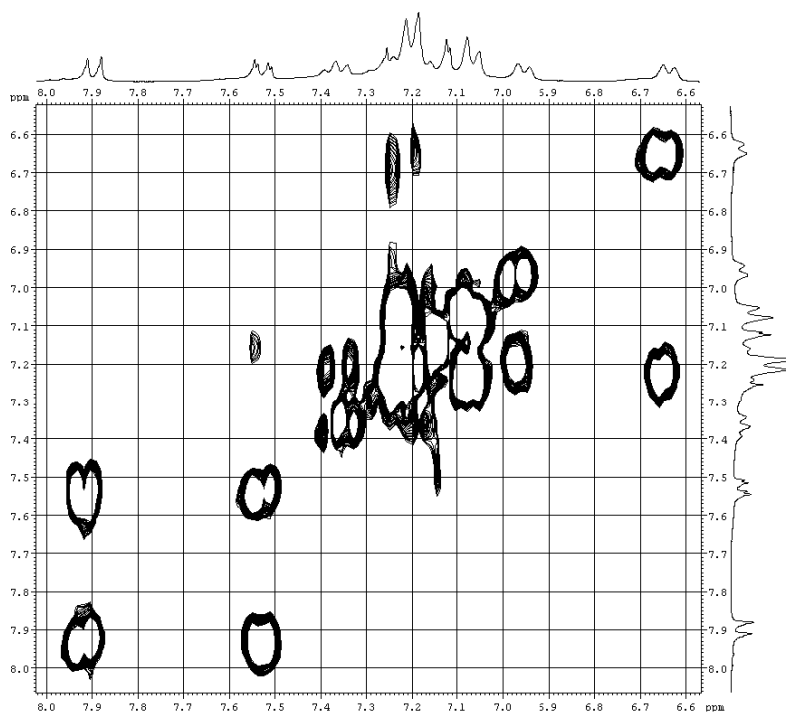

H,H-COSY Spectrum of **3i** (expanded)



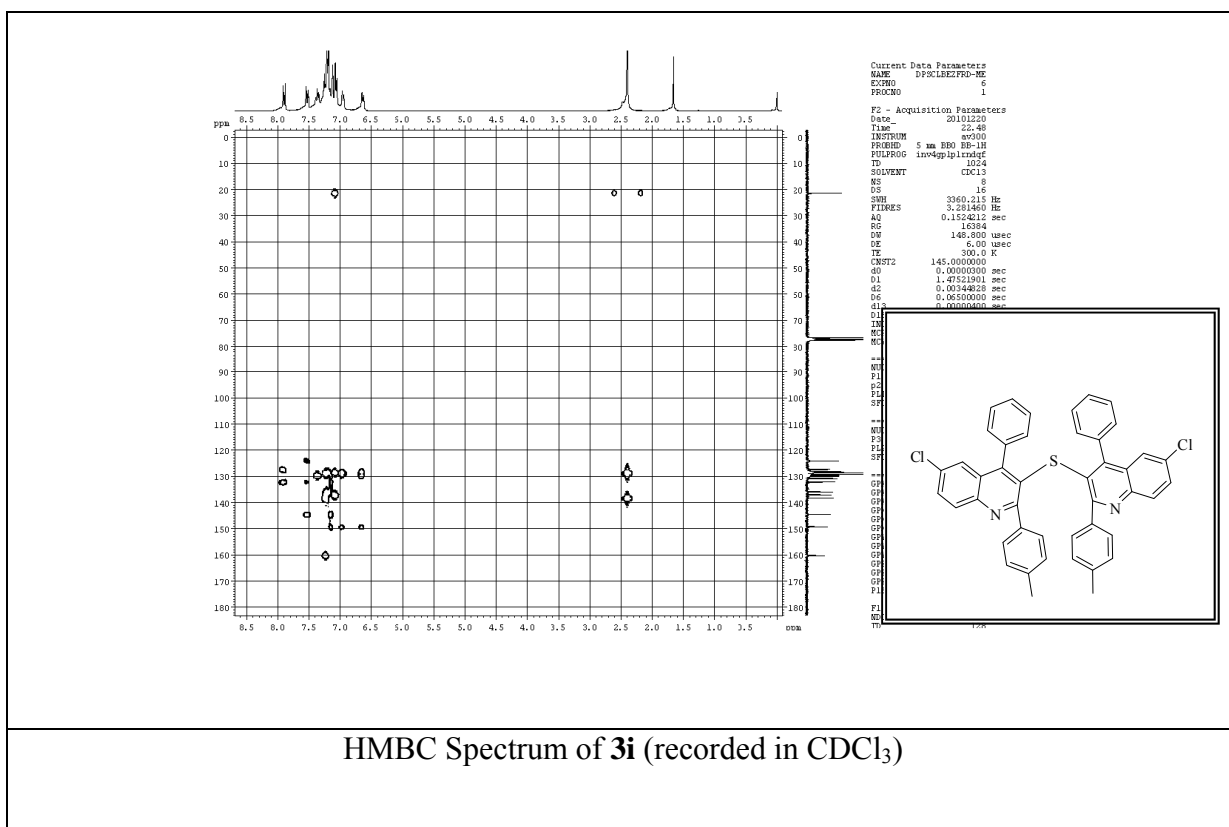

HMBC Spectrum of **3i** (recorded in CDCl<sub>3</sub>)

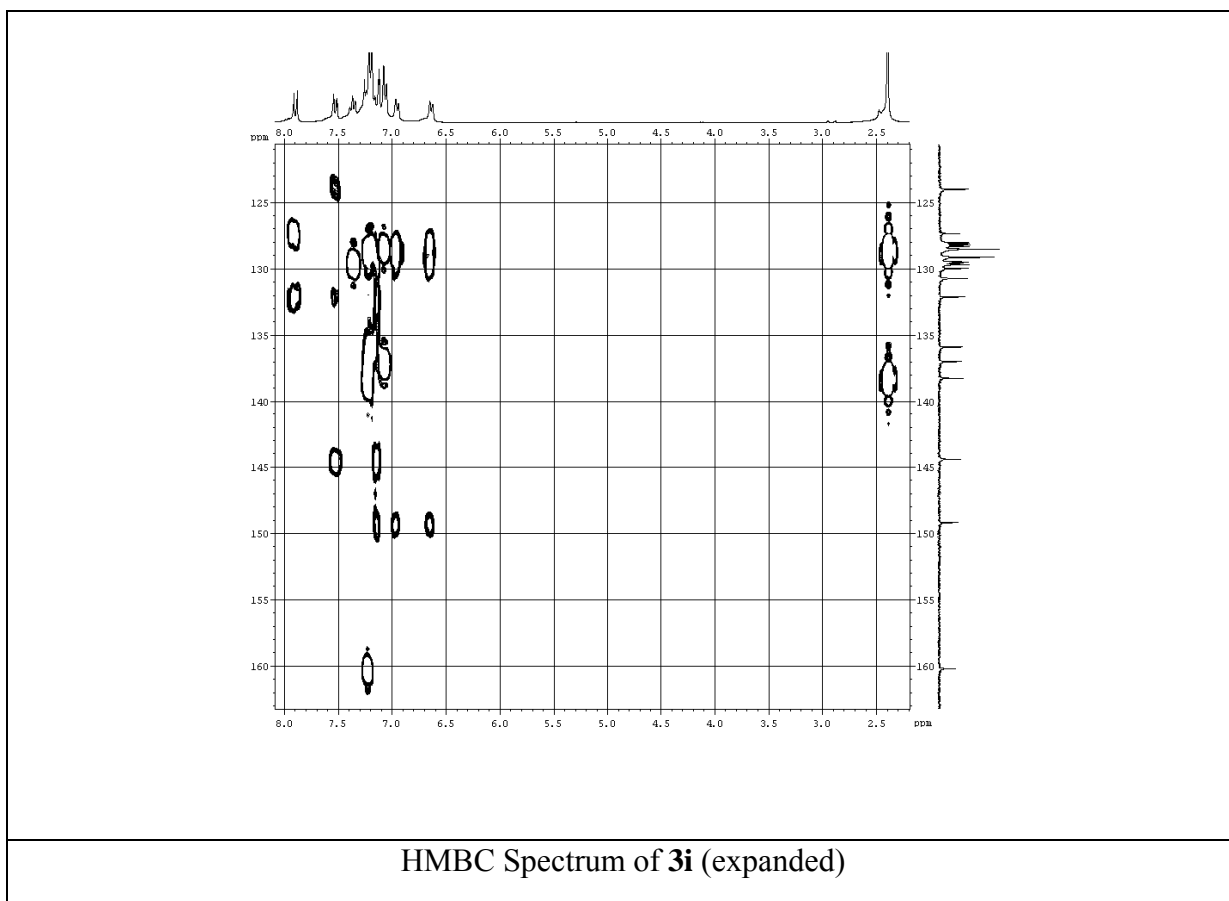

HMBC Spectrum of **3i** (expanded)

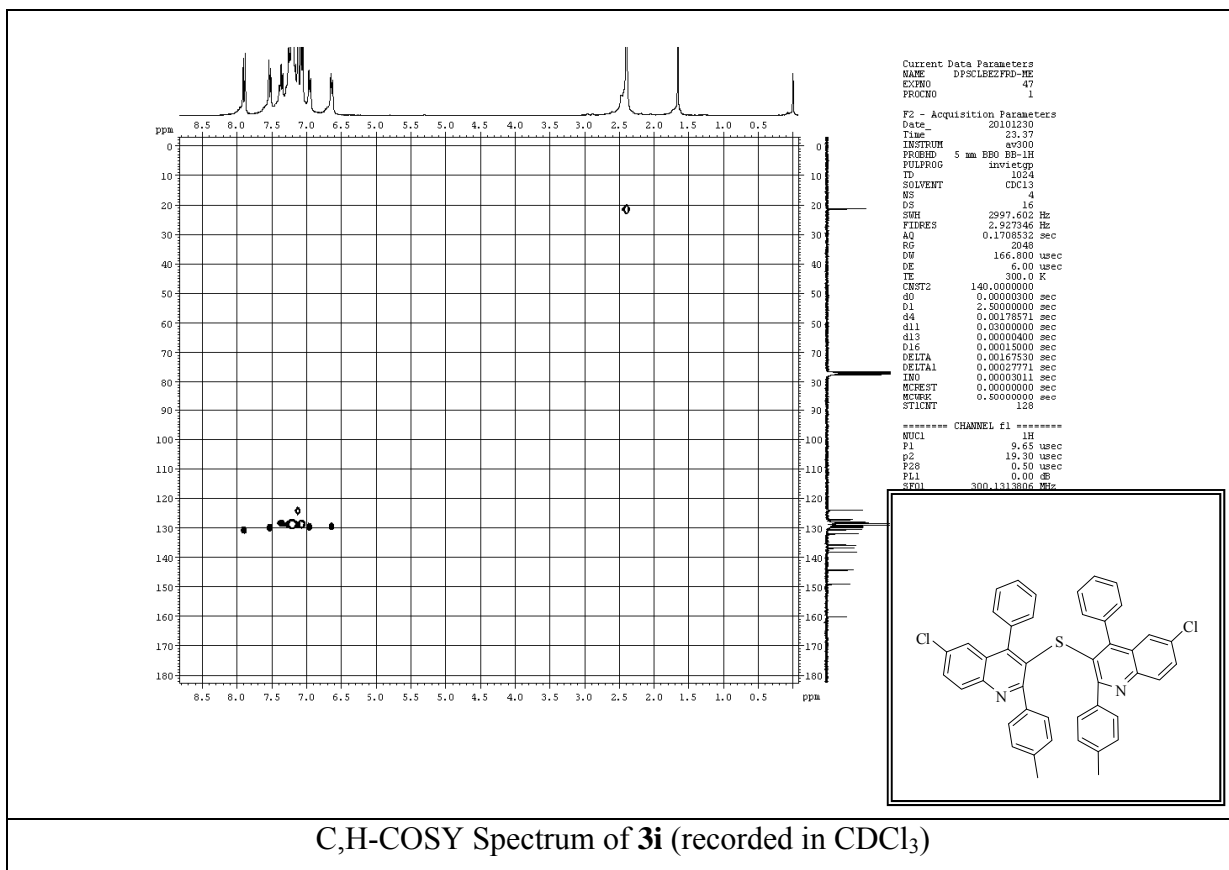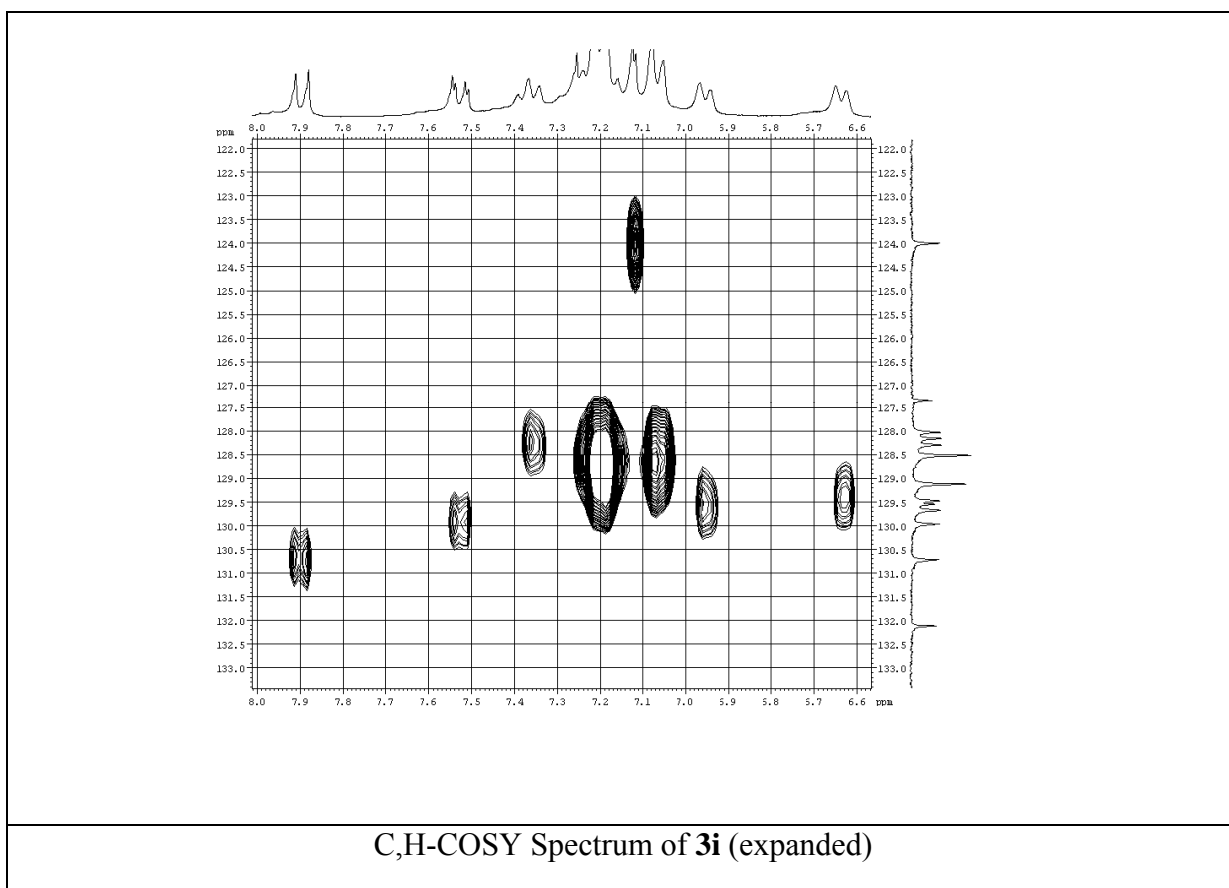

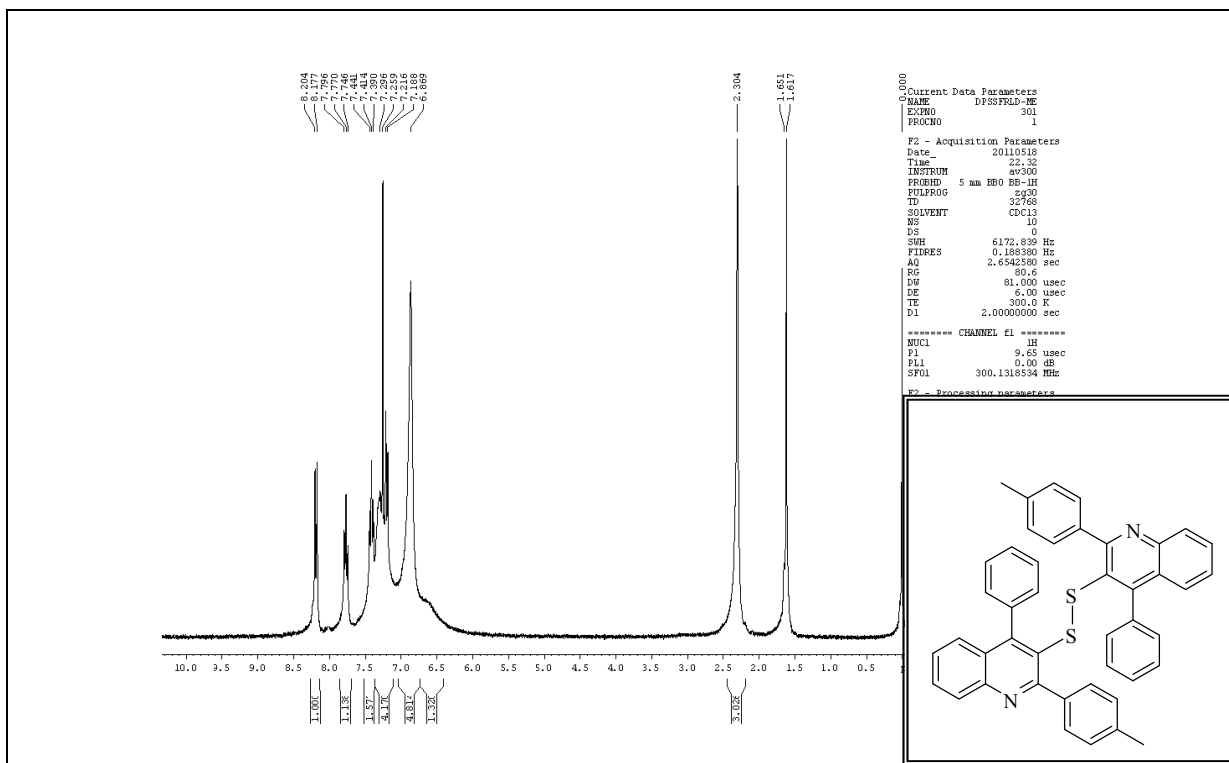

<sup>1</sup>H NMR Spectrum of **5b** (recorded in CDCl<sub>3</sub>)

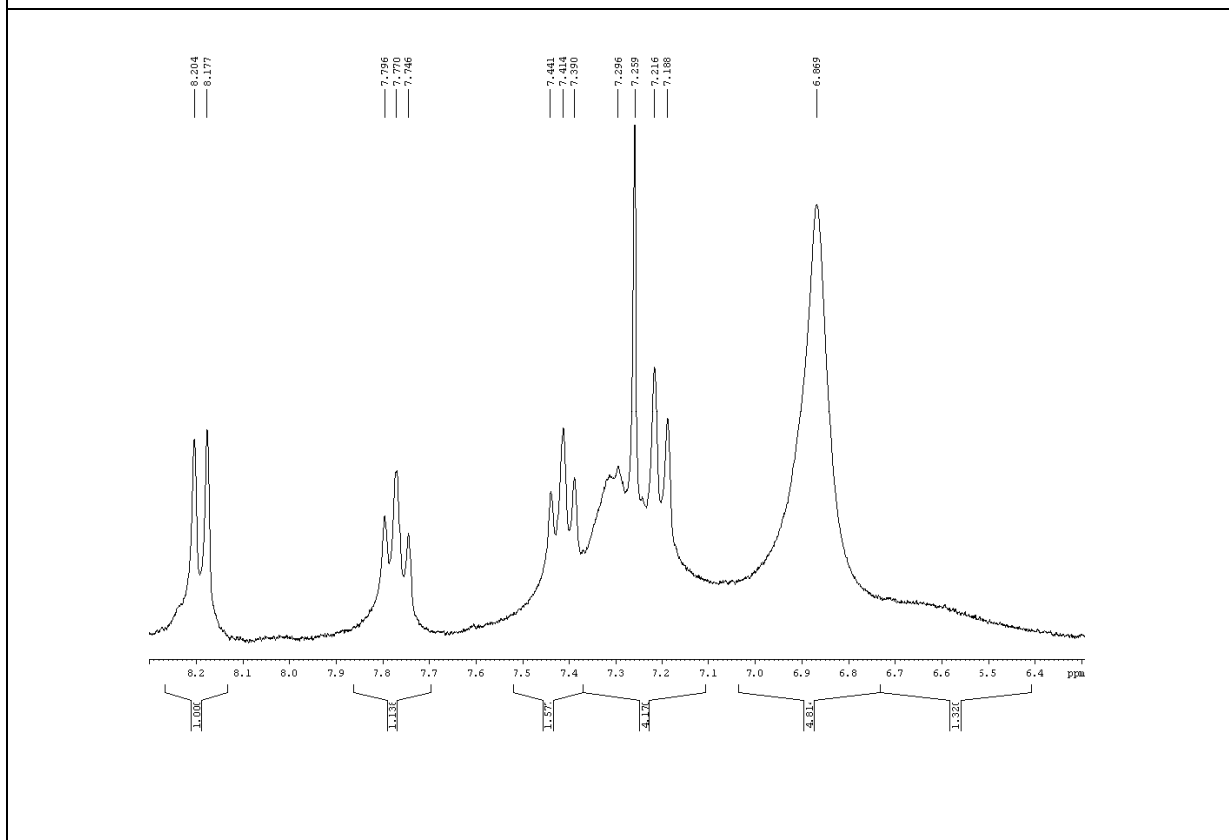

<sup>1</sup>H NMR Spectrum of **5b** (expanded)

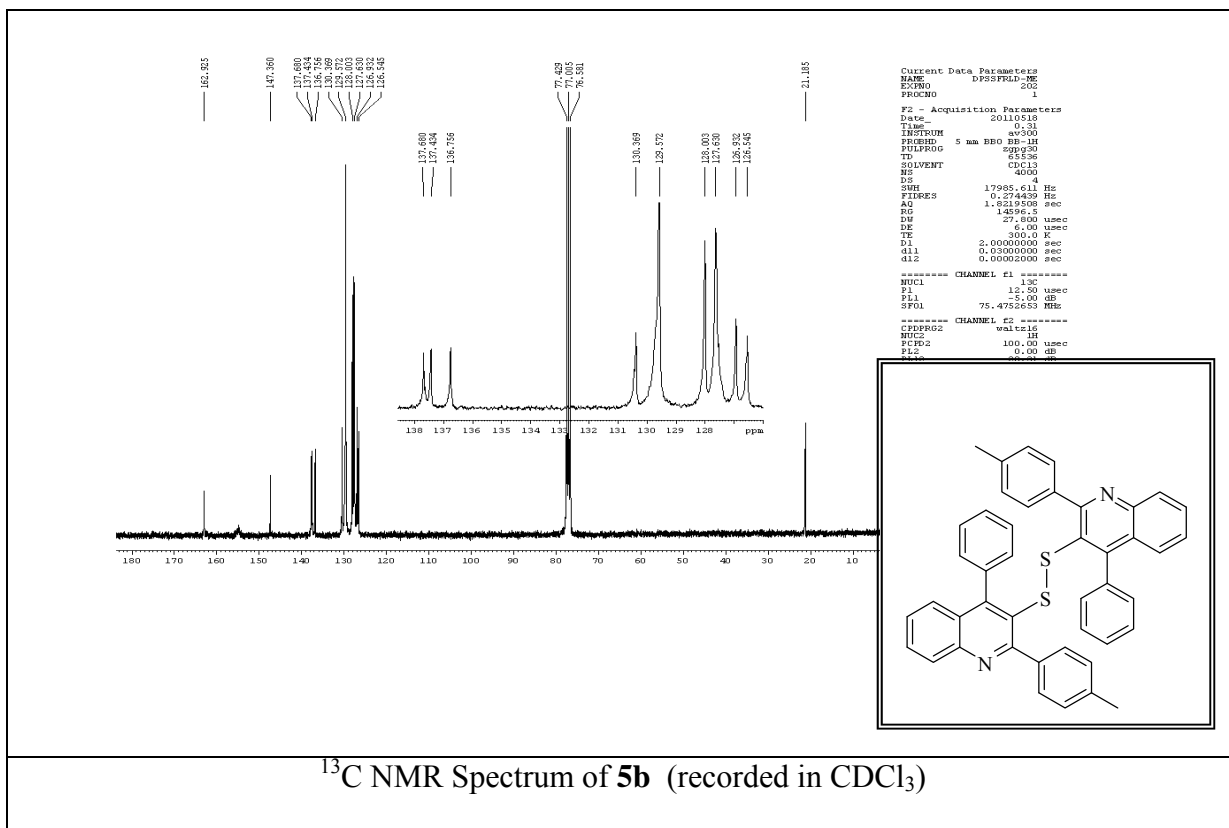

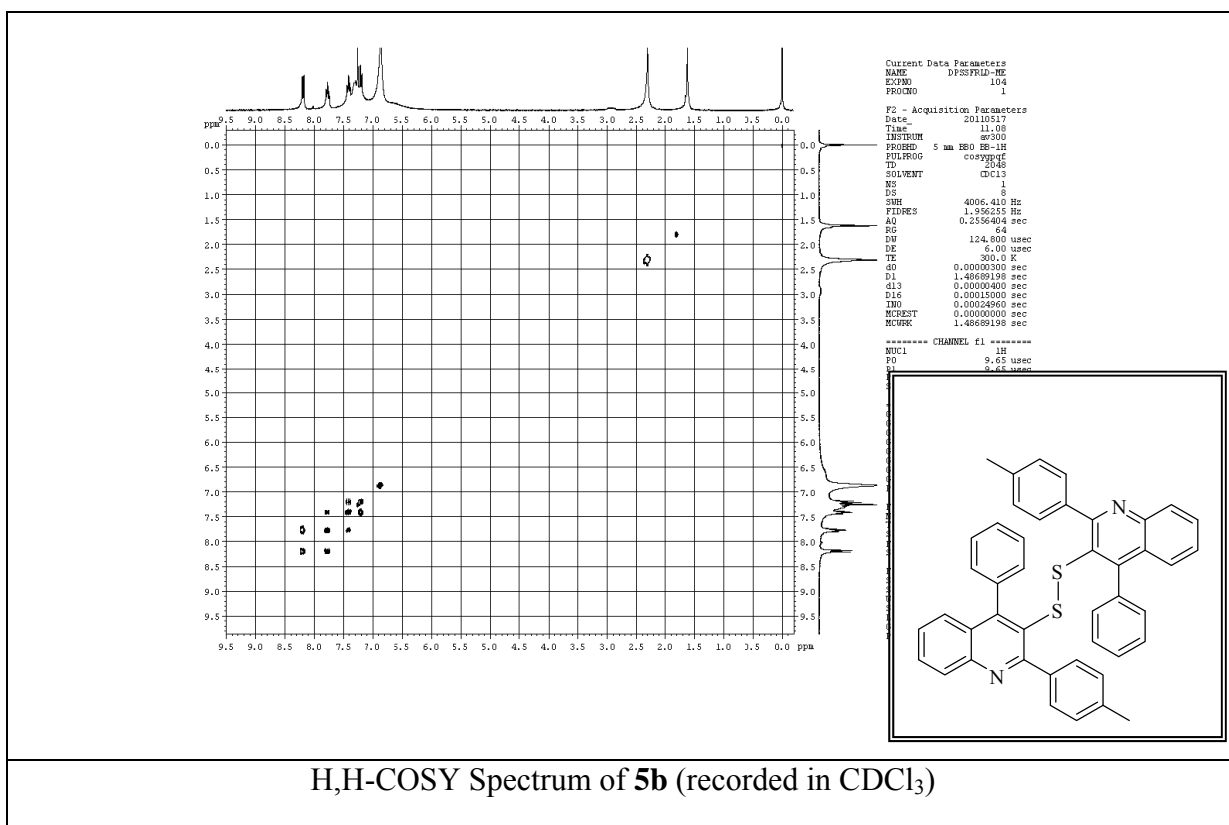

H,H-COSY Spectrum of **5b** (recorded in CDCl<sub>3</sub>)

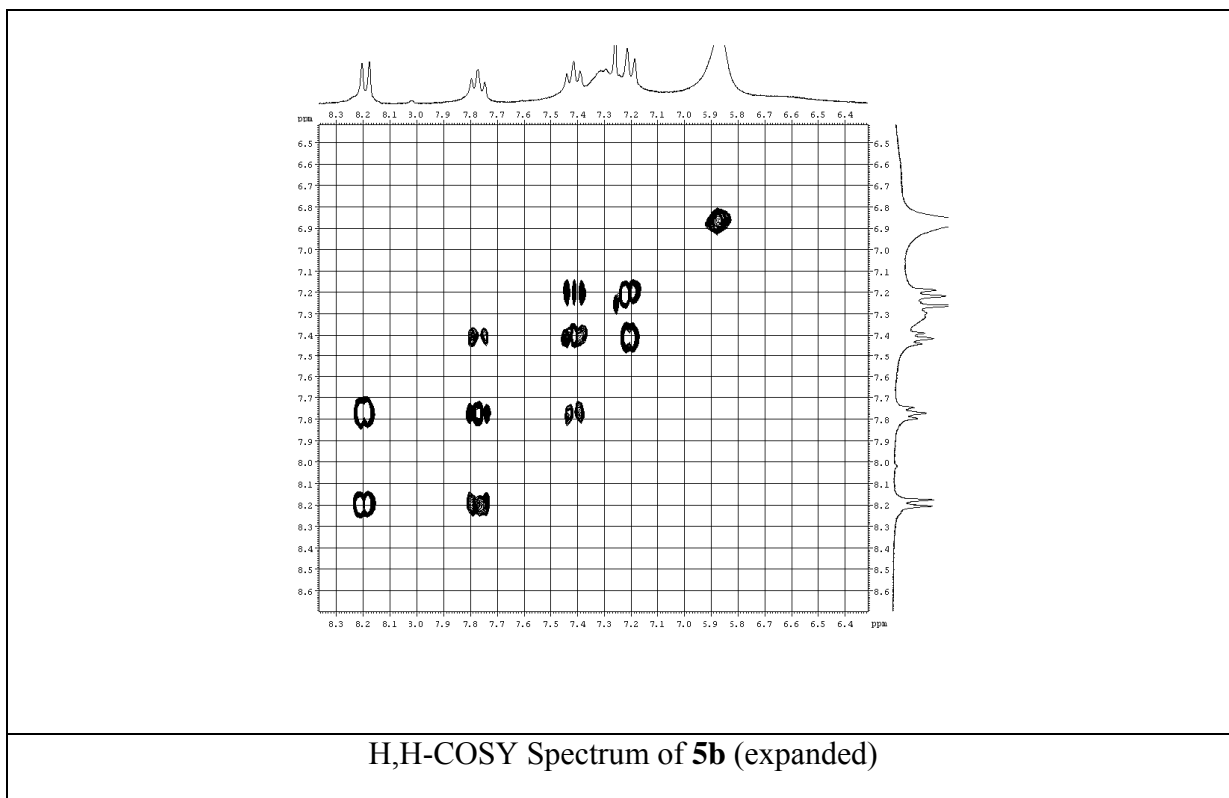

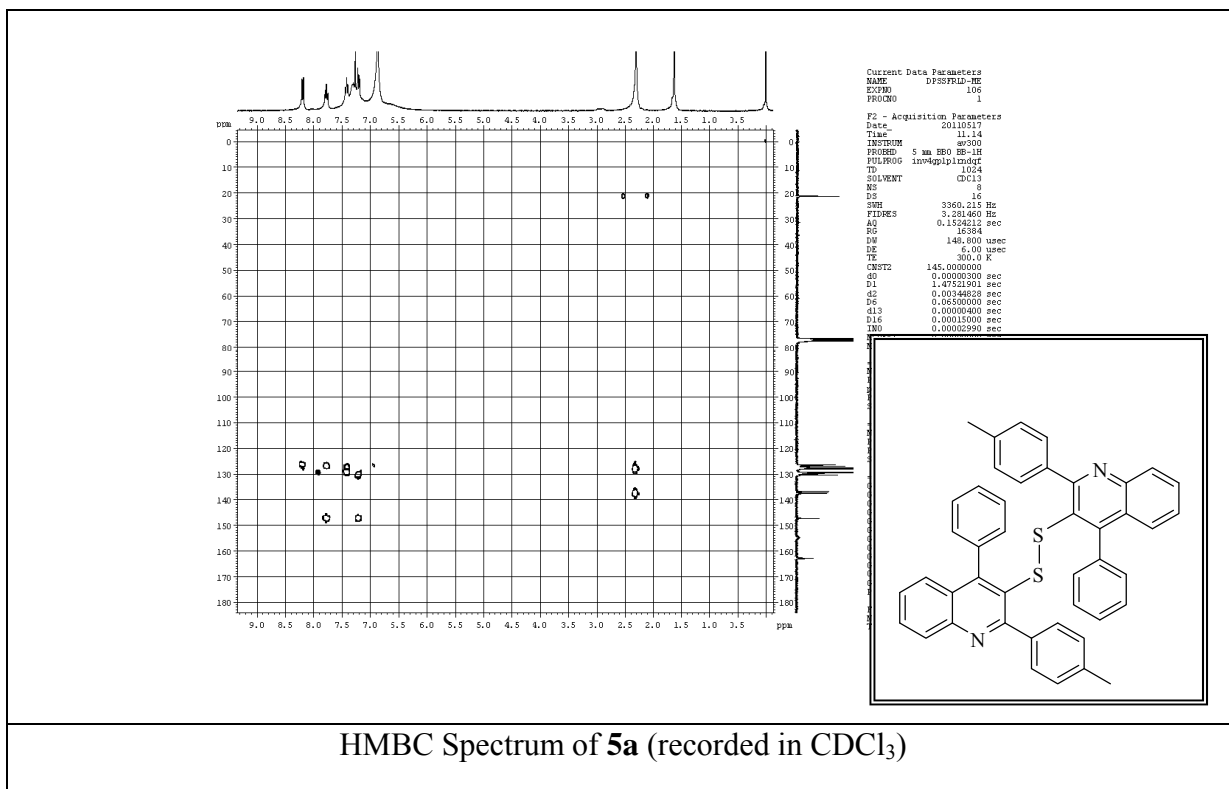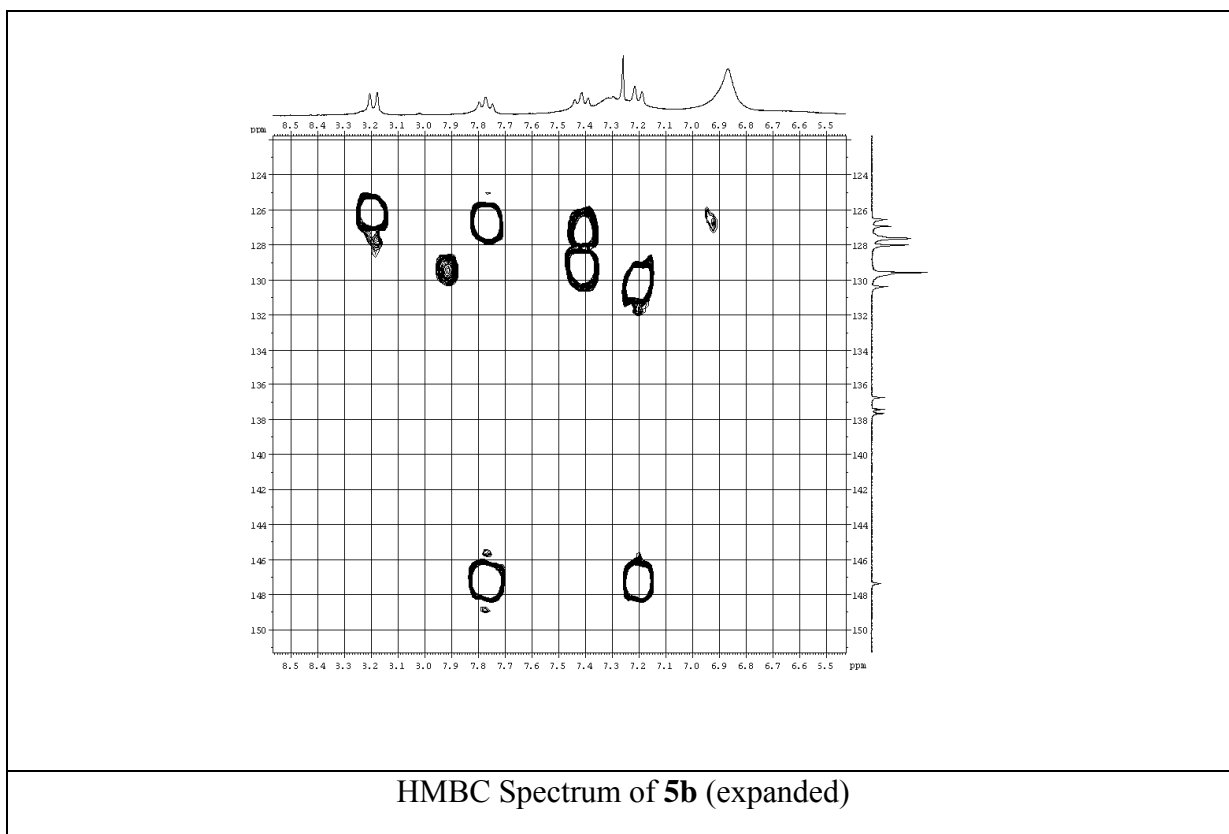

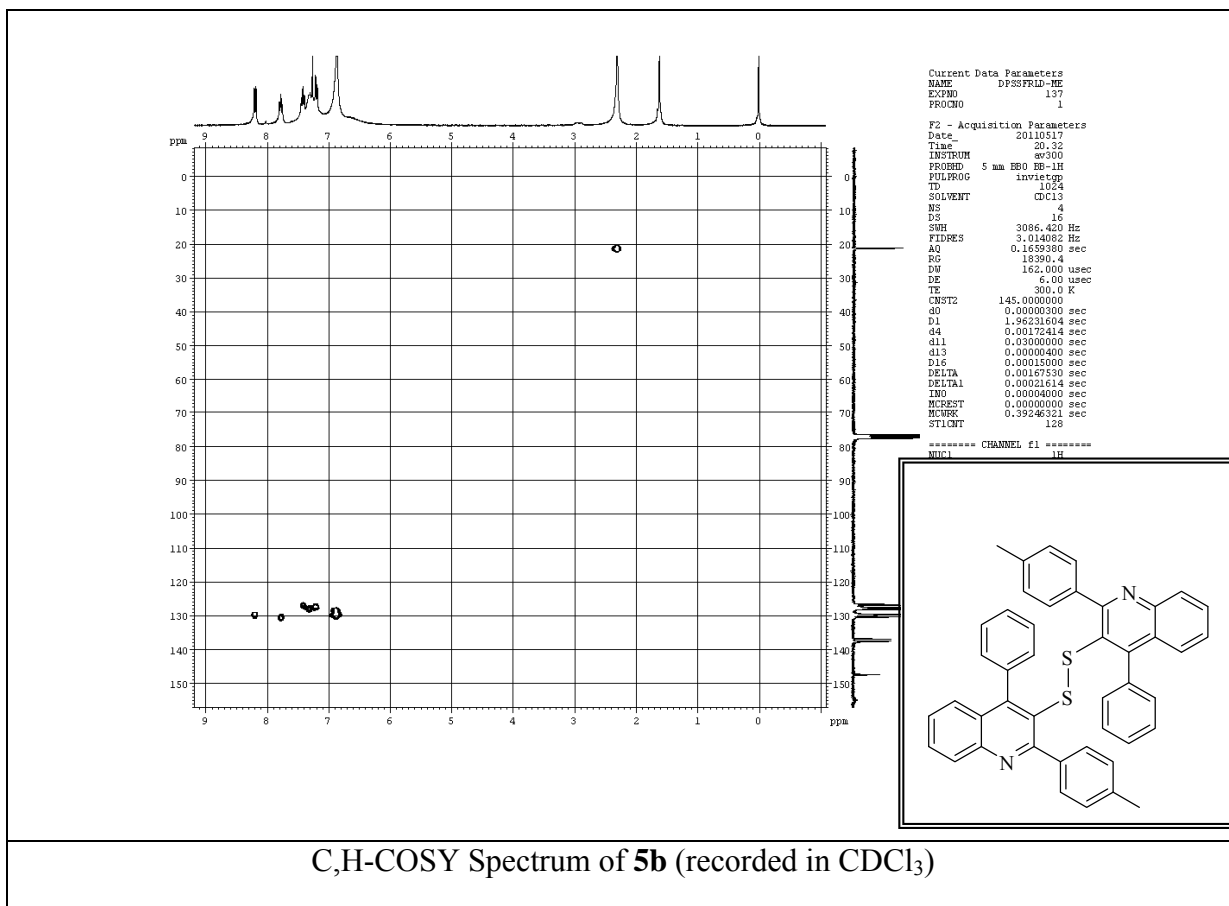

C,H-COSY Spectrum of **5b** (recorded in CDCl<sub>3</sub>)

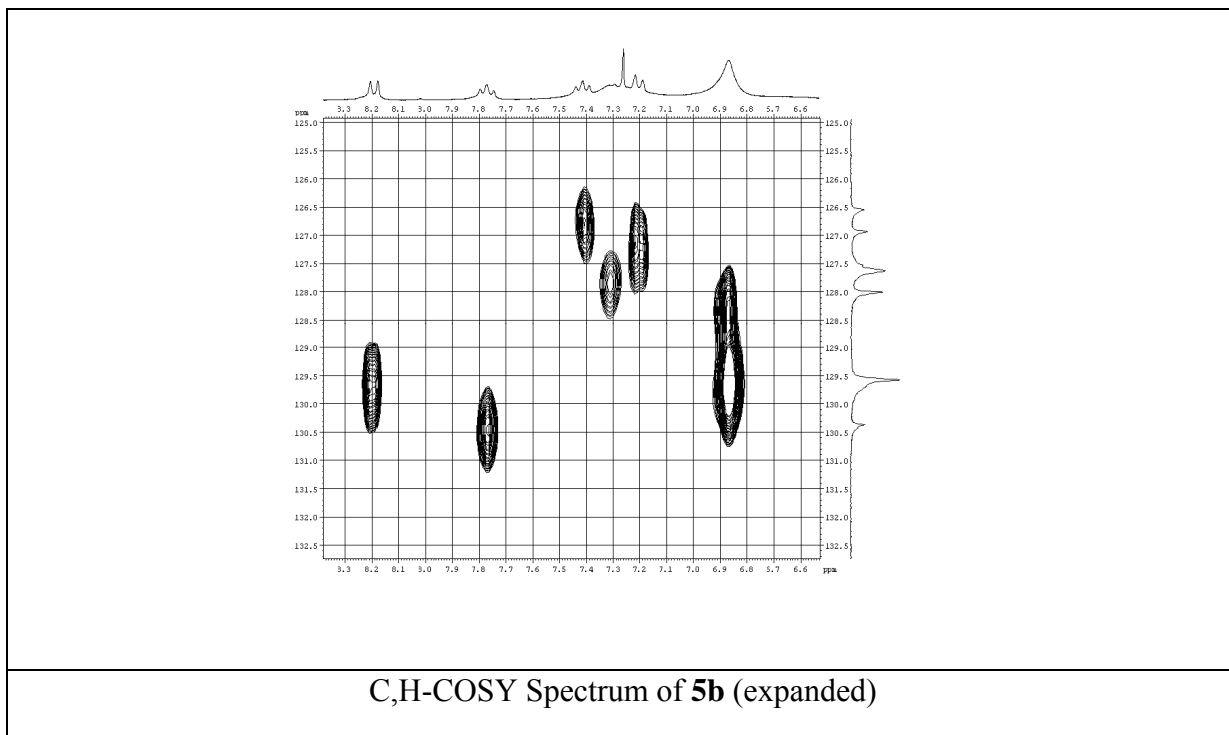

C,H-COSY Spectrum of **5b** (expanded)

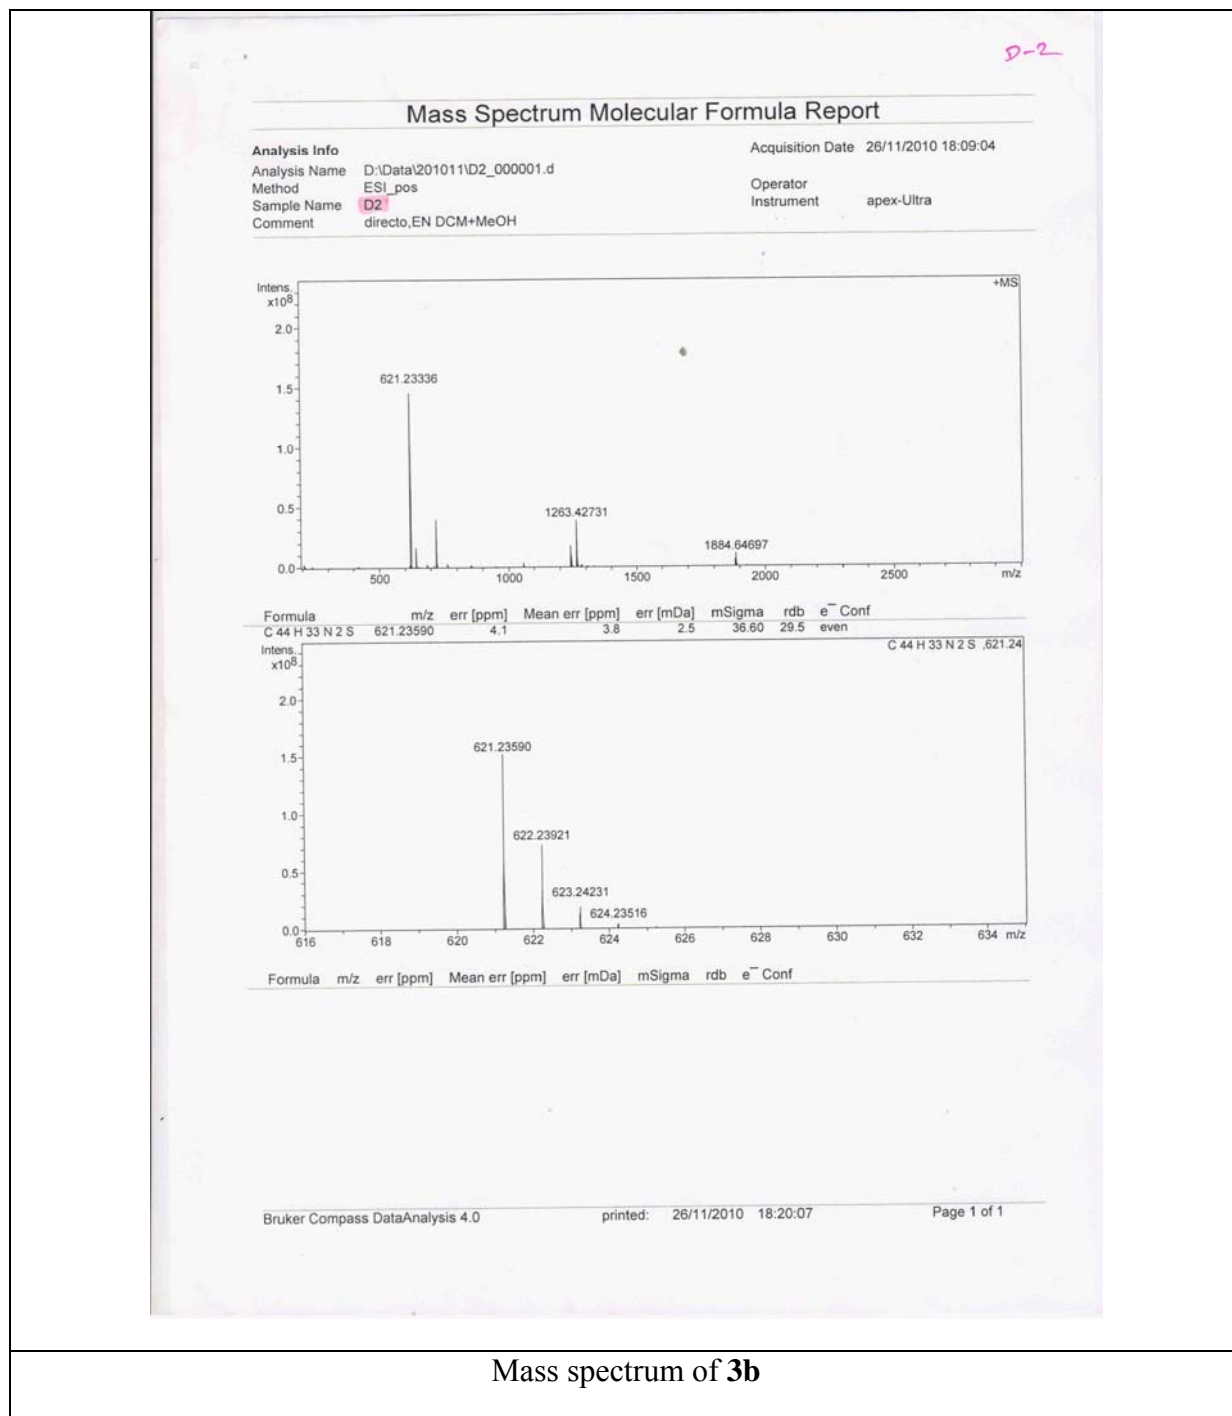



D-6

### Mass Spectrum Molecular Formula Report

**Analysis Info**

Analysis Name D:\Data\201011\ID6\_000004.d  
Method ESI\_pos  
Sample Name D6  
Comment directo,EN DCM+MeOH

Acquisition Date 10/11/2010 20:44:38

Operator  
Instrument apex-Ultra

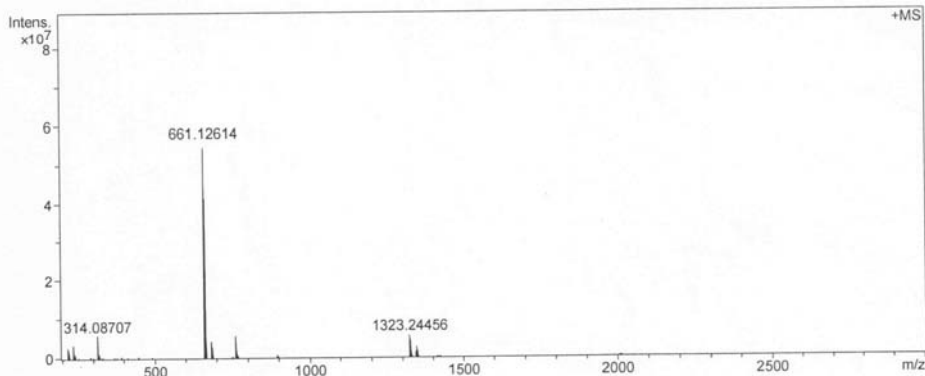

| Formula | m/z | err [ppm] | Mean err [ppm] | err [mDa] | mSigma | rdb | e <sup>-</sup> Conf |
|---------|-----|-----------|----------------|-----------|--------|-----|---------------------|
|---------|-----|-----------|----------------|-----------|--------|-----|---------------------|

C 42 H 27 Cl 2 N 2 S 661.12665 0.8 -0.5 0.5 50.69 29.5 even C 42 H 27 Cl 2 N 2 S ,661.13

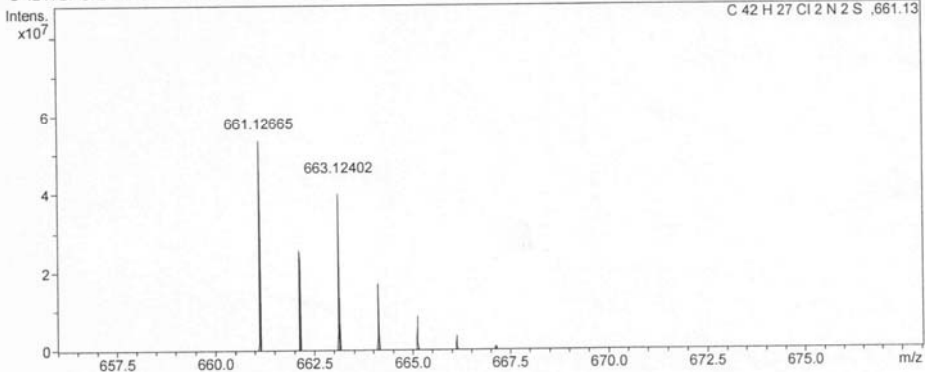

| Formula | m/z | err [ppm] | Mean err [ppm] | err [mDa] | mSigma | rdb | e <sup>-</sup> Conf |
|---------|-----|-----------|----------------|-----------|--------|-----|---------------------|
|---------|-----|-----------|----------------|-----------|--------|-----|---------------------|

Mass Spectrum of **3f**

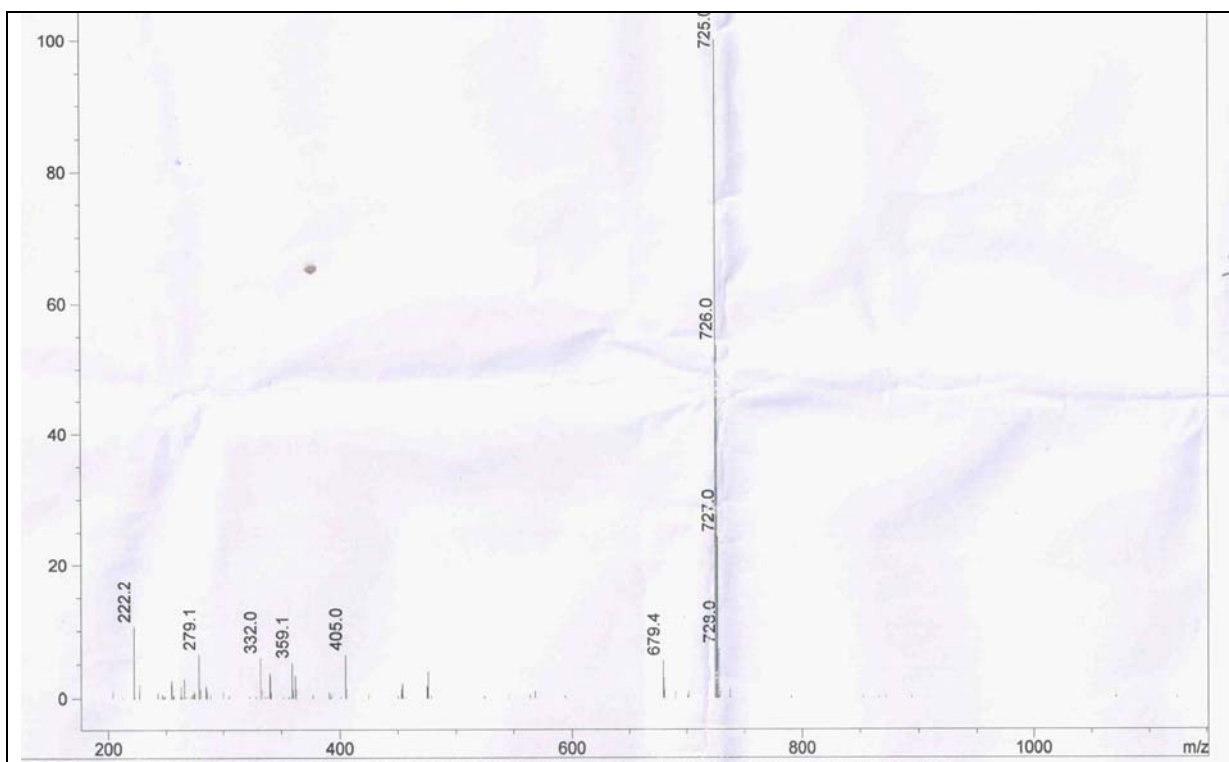

Mass Spectrum of **5a**

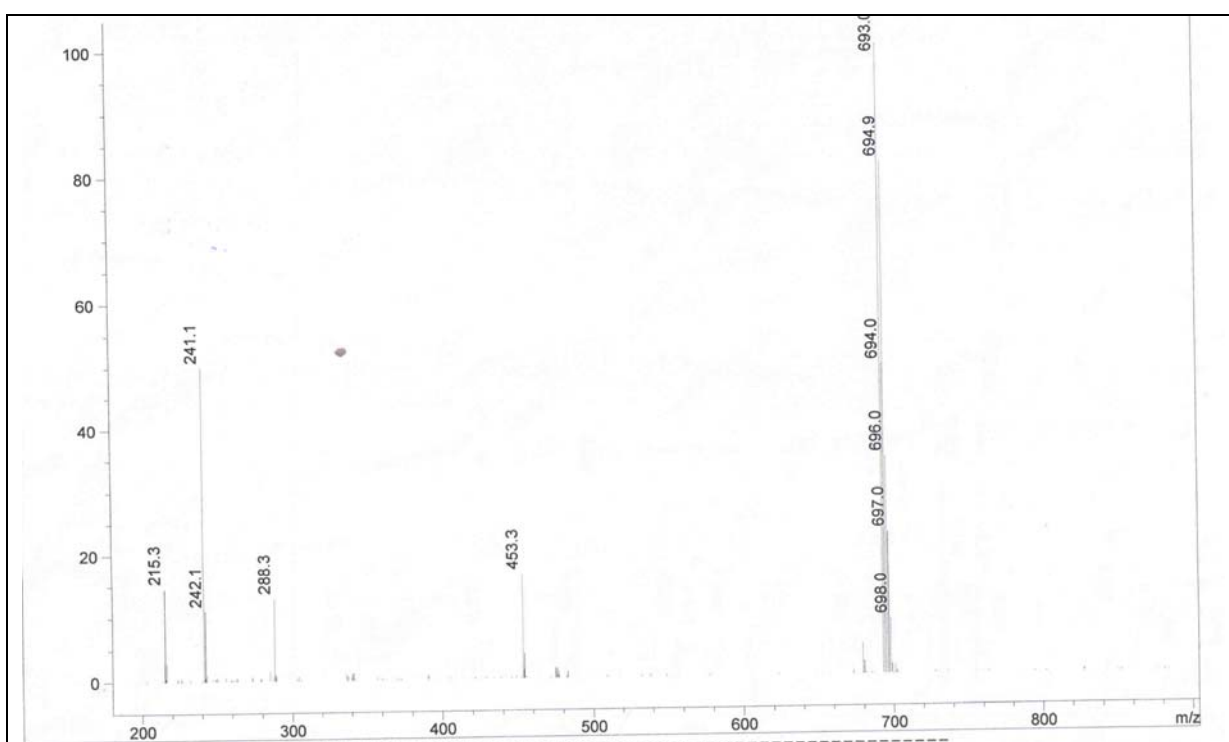

Mass Spectrum of **5c**
